38 **Abstract:**

39 **Background:** Non-steroidal anti-inflammatory drugs (NSAIDs) increase the risk of adverse  
40 cardiovascular events via suppression of cyclooxygenase (COX)-2-derived prostacyclin (PGI<sub>2</sub>)  
41 formation in heart, vasculature, and kidney. The Prospective Randomized Evaluation of  
42 Celecoxib Integrated Safety versus Ibuprofen Or Naproxen (PRECISION) trial and other large  
43 clinical studies compared the cardiovascular risk of traditional NSAIDs (i.e. naproxen), which  
44 inhibit both COX isozymes, with NSAIDs selective for COX-2 (i.e. celecoxib). However, whether  
45 pharmacologically equipotent doses were used - that is, whether a similar degree of COX-2  
46 inhibition was achieved - was not considered. We compared drug target inhibition and blood  
47 pressure response to celecoxib at the dose used by most patients in PRECISION with the  
48 lowest recommended naproxen dose for osteoarthritis, which is lower than the dose used in  
49 PRECISION.

50 **Methods:** Sixteen healthy participants (19-61 years) were treated with celecoxib (100 mg every  
51 12h), naproxen (250 mg every 12h), or placebo administered twice daily for seven days in a  
52 double-blind, crossover design randomized by order. On Day 7 when drug levels had reached  
53 steady state, the degree of COX inhibition was assessed *ex vivo* and *in vivo*. Ambulatory blood  
54 pressure was measured throughout the final 12h dosing interval.

55 **Results:** Both NSAIDs inhibited COX-2 activity relative to placebo, but naproxen inhibited  
56 COX-2 activity to a greater degree (62.9±21.7%) than celecoxib (35.7±25.2%; p<0.05).  
57 Similarly, naproxen treatment inhibited PGI<sub>2</sub> formation *in vivo* (48.0±24.9%) to a greater degree  
58 than celecoxib (26.7±24.6%; p<0.05). Naproxen significantly increased blood pressure  
59 compared to celecoxib (differences in least-square means of mean arterial pressure: 2.5 mm Hg  
60 (95% CI: 1.5, 3.5); systolic blood pressure: 4.0 mm Hg (95% CI: 2.9, 5.1); diastolic blood  
61 pressure: 1.8 mm Hg (95% CI: 0.8, 2.8); p<0.05 for all). The difference in systolic blood  
62 pressure relative to placebo was associated with the degree of COX-2 inhibition (p<0.05).

63 **Conclusions:** Celecoxib 200 mg/day inhibited COX-2 activity to a lesser degree than naproxen  
64 500 mg/day, resulting in a less pronounced blood pressure increase. While the PRECISION  
65 trial concluded the non-inferiority of celecoxib regarding cardiovascular risk, this is based on a  
66 comparison of doses that are not equipotent.

67 ClinicalTrials.gov identifier: NCT02502006 (<https://clinicaltrials.gov/study/NCT02502006>)

68

## 69 **Clinical Perspective**

- 70 • Naproxen 250 mg twice a day inhibited COX-2 activity to a greater degree than  
71 celecoxib 100 mg twice a day.
- 72 • The degree of COX-2 inhibition was associated with the increase in systolic blood  
73 pressure with NSAID treatment relative to placebo.
- 74 • Dose and its pharmacological potency achieved *in vivo* should be considered when  
75 evaluating the relative cardiovascular safety of COX-2-selective vs. non-selective  
76 NSAIDs.

## 77 Introduction

78 Non-steroidal anti-inflammatory drugs (NSAIDs) are among the most commonly used  
79 medications worldwide and the opioid crisis has placed a new emphasis on their use.<sup>1,2</sup>  
80 Approximately 20% of adults in the United States receive at least one NSAID prescription per  
81 year<sup>3</sup>, and 12% of adults in the United States reported using NSAIDs chronically, i.e. more than  
82 three times weekly for more than three months.<sup>4</sup> Consumption of NSAIDs in individuals at risk  
83 for musculoskeletal injuries is even more common.<sup>5-7</sup> Given the high prevalence of chronic pain  
84 in the United States – more than 100 million Americans suffer from chronic pain<sup>8</sup> – NSAIDs are  
85 an important non-addictive option for pain relief. Optimizing NSAID therapy is one strategy to  
86 address the current opioid crisis,<sup>2</sup> and rates of NSAID use have increased in recent years as  
87 opioid prescriptions have declined.<sup>9</sup> Although they lack the addictive potential of opioids,  
88 NSAIDs have the potential to cause serious, and in some cases, life-threatening adverse  
89 events, including gastrointestinal bleeding, renal dysfunction, hypertension, and thrombotic  
90 cardiovascular events.<sup>10</sup> Undetected blood pressure (BP) increases that may impact  
91 cardiovascular morbidity and mortality at the population level are a particular concern.<sup>11</sup>

92 NSAIDs exert their analgesic and anti-inflammatory effects via inhibition of  
93 cyclooxygenase (COX)-1 and/or COX-2, enzymes that catalyze the first committed step in  
94 prostaglandin (PG) synthesis. PGs produce a diverse array of biologic effects via activation of  
95 prostanoid receptors and play important roles in a variety of pathologic and homeostatic  
96 processes.<sup>12</sup> The risk of thrombotic events associated with the use of NSAIDs, particularly those  
97 selective for COX-2, is mediated via suppression of COX-2-derived prostacyclin (PGI<sub>2</sub>)  
98 formation in endothelial and vascular smooth muscle cells.<sup>13,14</sup> PGI<sub>2</sub> possesses potent anti-  
99 thrombotic and vasodilatory effects, and thus acts as a general inhibitor of platelet activation *in*  
100 *vivo*.<sup>12</sup> Non-selective NSAIDs also inhibit COX-2 in the vasculature, but the associated risk of  
101 thrombosis is mitigated to some extent by inhibition of formation of thromboxane A<sub>2</sub> (TxA<sub>2</sub>), a  
102 COX-1-derived PG released by activated platelets that promotes platelet activation and  
103 aggregation.<sup>10,15</sup> In addition to their effects on vascular PG production, NSAIDs inhibit renal PG  
104 formation, resulting in sodium retention and BP increases, which may further augment  
105 cardiovascular risk.<sup>10,15,16</sup>

106 One of the largest (N=24,081) outcome studies to date, the Prospective Randomized  
107 Evaluation of Celecoxib Integrated Safety versus Ibuprofen Or Naproxen trial (PRECISION),  
108 compared the safety of the COX-2 selective NSAID, celecoxib (100 to 200 mg twice a day), and  
109 two traditional NSAIDs, naproxen (375 to 500 mg twice a day) and ibuprofen (600 to 800 mg

110 three times a day), in osteoarthritis (90%) and rheumatoid arthritis (10%) patients. PRECISION  
111 concluded that the cardiovascular safety of moderate doses of celecoxib (average dose:  
112 209±37 mg/day) was noninferior to naproxen (average dose: 852±103 mg/day) or ibuprofen  
113 (average dose: 2045±246 mg/day).<sup>17</sup> However, a secondary on-treatment analysis of  
114 PRECISION showed a lower risk of cardiorenal events in the celecoxib group than the ibuprofen  
115 and naproxen groups.<sup>18</sup> Similarly, a pre-specified substudy (PRECISION-ABPM) reported that  
116 the percentage of patients with normal baseline blood pressure who developed hypertension  
117 was significantly greater in patients treated with naproxen (19%) or ibuprofen (23%), than with  
118 celecoxib (10%).<sup>19</sup> However, the degree of COX-2 inhibition attained has never been assessed  
119 in clinical outcome trials, and thus it is unknown whether the doses employed in PRECISION  
120 were equipotent. Here, we compared the pharmacologic potency of celecoxib, 200 mg/day (the  
121 highest dose allowed for osteoarthritis and roughly the average daily dose in PRECISION), with  
122 naproxen, 500 mg/day (the lowest recommended dose for osteoarthritis and approximately 40%  
123 lower than the average daily dose in PRECISION), and how this relates to blood pressure  
124 response to NSAIDs in a highly controlled study in apparently healthy volunteers.

125

## 126 **Methods**

### 127 *Participants*

128 Men and women (≥18 years of age) who were in good health based on medical history,  
129 physical examination, vital signs, and laboratory tests were enrolled. Participants were  
130 excluded if they were pregnant or nursing a child, smoked or used nicotine-containing products,  
131 were obese (body mass index (BMI) > 30 kg/m<sup>2</sup>), had a history of significant cardiovascular,  
132 gastrointestinal, renal, hepatic, respiratory, immune, endocrine, hematologic, or neurological  
133 disease, a history of cancer within the last 5 years, or a coagulation or bleeding disorder, were  
134 sensitive or allergic to celecoxib, naproxen, aspirin, or other NSAIDs, or had used NSAIDs  
135 (including acetaminophen), dietary or herbal supplements containing salicylates, Vitamin E, fish  
136 oil, or any other herbal supplements, within 14 days of study drug administration.

### 137 *Study procedures*

138 The study protocol was approved by the University of Pennsylvania Institutional Review  
139 Board (IRB#820715; ClinicalTrials.gov: NCT02502006), and all participants provided informed  
140 consent. The study was a randomized, double-blind, three-way crossover study comparing the  
141 degree of COX inhibition and the blood pressure response at steady state following treatment

142 with celecoxib (100 mg twice daily), naproxen (250 mg twice daily), or placebo (twice daily) for 7  
143 days. Prior to beginning treatment, all participants attended a screening visit to obtain a  
144 complete medical history and confirm eligibility. They were asked to abstain from analgesics,  
145 including products containing NSAIDs (including aspirin and acetaminophen), high dose  
146 vitamins, and nutritional supplements until study completion.

147 On the first day of each treatment phase, baseline blood and urine samples were  
148 collected, and participants were given a blisterpack with blinded study medication to be taken by  
149 mouth twice daily on an outpatient basis. Study medication was blinded by over-encapsulation  
150 by the University of Pennsylvania Investigational Drug Service. On the morning of day 7,  
151 participants returned to clinic for a 12-hour visit for pharmacokinetic-pharmacodynamic (PK-PD)  
152 sampling. An ambulatory blood pressure monitor (ABPM, Spacelabs 90207), which recorded  
153 blood pressure every 15 minutes throughout the study visit, was placed on the non-dominant  
154 upper arm. Blood and urine samples were collected (T=0), and the final dose of study  
155 medication was administered. Additional samples were collected 0.5 (blood only), 1, 2, 4, 8,  
156 and 12 hours after study medication administration. Participants were discharged after the 12-  
157 hour sample collection. These study visits were repeated for the next two treatment phases,  
158 with a washout period of at least 2 weeks between each treatment phase.

159 Study data were collected and managed using REDCap (Research Electronic Data  
160 Capture) hosted at the University of Pennsylvania Perelman School of Medicine.<sup>20,21</sup>

### 161 *Quantification of COX activity and plasma drug concentrations*

162 COX-1 activity *ex vivo* was evaluated by quantifying serum thromboxane B<sub>2</sub> levels, as  
163 previously described.<sup>22</sup> Briefly, whole blood was collected into vacuum tubes containing clot  
164 activator and incubated in a water bath at 37°C for 1 hour. Serum was separated by  
165 centrifugation and stored at -80°C until analysis by liquid chromatography-tandem mass  
166 spectrometry (LC-MS/MS).

167 COX-2 activity *ex vivo* was evaluated by quantifying plasma PGE<sub>2</sub> levels following  
168 lipopolysaccharide (LPS) stimulation in whole blood, as previously described.<sup>23</sup> Briefly,  
169 heparinized whole blood was treated with aspirin (1 mM) and incubated at room temperature for  
170 15 minutes. LPS (E. coli, serotype O111:B4, 10 µg/ml whole blood) was added, and the sample  
171 was incubated in a water bath at 37°C for 24 hours. Plasma was separated by centrifugation  
172 and stored at -80°C until analysis by LC-MS/MS.

173 COX activity *in vivo* was determined by quantification of urinary prostanoid metabolites  
174 by LC-MS/MS as previously described.<sup>14</sup> Systemic production of PGI<sub>2</sub>, PGE<sub>2</sub>, PGD<sub>2</sub>, and

175 thromboxane (Tx) A<sub>2</sub> was determined by quantifying their major urinary metabolites: 2,3-dinor 6-  
176 keto-PGF<sub>1α</sub> (PGIM), 7-hydroxy-5,11-diketotetranorprostane-1,16-dioic acid (PGEM), 11,15-  
177 dioxo-9α-hydroxy-2,3,4,5-tetranorprostan-1,20-dioic acid (PGDM), and 2,3-dinor TxB<sub>2</sub> (TxM),  
178 respectively. Results were normalized to urinary creatinine measured by LC-MS/MS.

179 Plasma concentrations of celecoxib and naproxen were quantified by LC-MS/MS as  
180 previously described.<sup>24</sup>

## 181 *Statistical analysis*

182 Measurements of COX activity *ex vivo* and urinary PG metabolite levels were normalized  
183 to the mean value during the placebo phase for each subject to calculate the percent of COX  
184 inhibition relative to placebo. Area-under-the-curve from T=0 to T=12 hours (AUC) was  
185 calculated as a measure of the degree of COX inhibition throughout the dosing interval. The  
186 degree of COX inhibition was compared by paired t-test. The effect of treatment on COX  
187 activity and ABP over time was analyzed by linear mixed effect modeling using the lme4 R  
188 package,<sup>25</sup> including time and treatment as main effects and participant as a random effect.  
189 The relationship between change in SBP and COX inhibition over the 12-hour dosing interval  
190 was evaluated by linear regression. P<0.05 was considered statistically significant. Statistical  
191 analyses were performed in R (version 4.3.1).

192

## 193 **Results**

194 The study cohort included 16 healthy adults (9 men, 7 women) with a mean age of  
195 34.7±13.4 years. Baseline demographic and clinical characteristics are shown in Table 1.  
196 Biochemical measures were evaluated in all participants. One participant was excluded from  
197 ABP analysis due to ABPM malfunction and incomplete data.

198 Naproxen 250 mg twice daily inhibited COX-1 activity and COX-2 activity *ex vivo* by  
199 95.3±4.4% and 62.9±21.7%, respectively, while celecoxib 100 mg twice daily had minimal  
200 effects on COX-1 activity *ex vivo* and inhibited COX-2 activity *ex vivo* by 35.7±25.2% over the  
201 12-hour dosing interval (Figure 1). Similar results were observed for COX activity *in vivo*,  
202 assessed by urinary PG metabolite concentrations. TxM (an index of COX-1 activity) was  
203 inhibited by 68.2±18.7% with naproxen treatment and 8.9±35.7% with celecoxib treatment.  
204 PGIM (an index of COX-2 activity *in vivo*) was inhibited by 48.0±24.9% with naproxen treatment  
205 and 26.7±24.6% with celecoxib treatment. With all functional parameters, the degree of COX  
206 inhibition was significantly greater with naproxen treatment than celecoxib treatment (p<0.05).  
207 The maximum plasma concentration (C<sub>max</sub>) of naproxen was 228±45.1 μM, and the time to

208 maximum plasma concentration ( $t_{\max}$ ) was  $1.8\pm 1.2$  h after administration. For celecoxib,  $C_{\max}$   
209 was  $1.28\pm 0.55$   $\mu\text{M}$ , and  $t_{\max}$  was  $2.3\pm 1.2$  h.

210 During the placebo phase, average MAP, SBP, and DBP were  $89.7\pm 8.7$  mmHg,  
211  $124.1\pm 11.2$  mm Hg, and  $73.3\pm 8.7$  mm Hg, respectively. NSAID treatment affected MAP and  
212 SBP over the 12-hour dosing interval (Figure 2). Naproxen treatment significantly increased  
213 MAP (Difference in LS means: 3.1 mm Hg (95% CI: 2.1, 4.1);  $p<0.05$ ), SBP (Difference in LS  
214 means: 2.9 mm Hg (95% CI: 1.8, 4.0);  $p<0.05$ ) and DBP (Difference in LS means: 3.2 mm Hg  
215 (95% CI: 2.2, 4.2);  $p<0.05$ ) relative to placebo. In contrast, celecoxib treatment did not affect  
216 MAP (Difference in LS means: 0.6 mm Hg (95% CI: -0.3, 1.6);  $p=0.28$ ), but significantly  
217 decreased SBP (Difference in LS means: -1.1 mm Hg (95% CI: -2.2, 0.04);  $p<0.05$ ) and  
218 increased DBP (Difference in LS means: 1.4 mm Hg (95% CI: 0.4, 2.4);  $p<0.05$ ) relative to  
219 placebo. Compared to celecoxib, naproxen significantly increased MAP (Difference in LS  
220 means: 2.5 mm Hg (95% CI: 1.5, 3.5);  $p<0.05$ ), SBP (Difference in LS means: 4.0 mm Hg (95%  
221 CI: 2.9, 5.1);  $p<0.05$ ), and DBP (Difference in LS means: 1.8 mm Hg (95% CI: 0.8, 2.8);  
222  $p<0.05$ ).

223 Linear regression was performed to determine whether the degree of COX-1 or COX-2  
224 inhibition *ex vivo* predicted the difference in SBP with NSAID treatment relative to placebo  
225 (Figure 3). COX-2 inhibition *ex vivo* was a predictor of difference in SBP ( $\beta=-10.38$ , 95%  
226 confidence interval=-19.27 to -1.482,  $R^2=0.1694$ ,  $F(1,28)=5.710$ ,  $p=0.0238$ ), but COX-1  
227 inhibition *ex vivo* was not significantly associated with difference in SBP ( $\beta=-2.194$ , 95%  
228 confidence interval=-6.068 to 1.680,  $R^2=0.04587$ ,  $F(1,28)=1.346$ ,  $p=0.2558$ ).

229

## 230 Discussion

231 Given the high prevalence of chronic pain in the United States,<sup>26</sup> NSAIDs are an  
232 important non-addictive option for pain relief.<sup>2</sup> Currently, it is recommended that NSAIDs be  
233 avoided or used only for a limited duration at the lowest possible dose in patients considered at  
234 high cardiovascular risk.<sup>27</sup> As COX-2 inhibition mechanistically underlies the cardiovascular  
235 risk, a key question remains whether differences in the cardiovascular safety profile exist  
236 between traditional NSAIDs (i.e. naproxen) which inhibit both COX-1 and COX-2, and selective  
237 inhibitors of COX-2 (i.e. celecoxib).<sup>28</sup> The largest comparator trial to address this question,  
238 PRECISION, indicated that celecoxib is noninferior to naproxen and ibuprofen with regard to  
239 cardiovascular risk.<sup>17</sup> Importantly, the dose of celecoxib was limited to 200 mg/day in  
240 osteoarthritis patients enrolled in PRECISION, which made up the vast majority of the study



241 population. Limiting the dose in osteoarthritis patients had been a regulatory response to the  
242 cardiovascular hazard detected in previous randomized controlled trials. Although the  
243 pharmacological potency of celecoxib measured with isolated COX-2 enzyme or cellular  
244 preparations *in vitro* is higher than that of naproxen,<sup>29</sup> here we demonstrate that the average  
245 daily dose of celecoxib used in the PRECISION trial inhibited COX-2 activity *in vivo* to a lesser  
246 degree than a low dose of naproxen and that this impacted the blood pressure response to  
247 NSAID treatment. Our results underscore the importance of considering dose and  
248 pharmacoequivalence *in vivo* in comparisons of safety among drugs of the same class.

249 Only a small number of clinical trials have prospectively assessed the effects of COX  
250 inhibition on BP control. Based on these studies, increases of 3-5 mmHg in SBP can be  
251 expected.<sup>16</sup> In our cohort, naproxen treatment increased SBP relative to placebo (2.9 mm Hg  
252 (95% CI: 1.8,4.0)) to a greater extent than celecoxib treatment (-1.1 mm Hg (95% CI: -2.2,-  
253 0.04)) over the 12-hour dosing interval. This difference is similar to what was observed in  
254 PRECISION-ABPM, where the change in SBP from baseline after 4 months of treatment was -  
255 0.18±9.400 mm Hg among celecoxib-treated patients and 1.91±9.796 mm Hg among naproxen-  
256 treated patients.<sup>19</sup> Notably, we observed that the difference in SBP was associated with the  
257 degree of COX-2 inhibition on NSAID treatment, consistent with the inhibition of COX-2-  
258 mediated PGI<sub>2</sub> formation as the primary mechanism underlying the increased cardiovascular  
259 risk associated with NSAID use.

260 Although naproxen increased SBP to a greater extent than celecoxib in our study cohort,  
261 the blood pressure response to NSAID treatment was heterogeneous among individual patients.  
262 The effects of COX inhibition on blood pressure control are complex, which may contribute to  
263 the variable occurrence of hypertension on NSAIDs.<sup>10,15,16,30</sup> In the renal cortex, the production  
264 of vasodilatory PGE<sub>2</sub> and PGI<sub>2</sub> maintain the patency of adjacent afferent arterioles,<sup>16,31</sup> and  
265 COX-2 expression in renal medullary interstitial cells play an important role in the adaptive  
266 regulation of blood pressure in response to high salt diet and dehydration.<sup>32-34</sup> COX inhibition in  
267 these regions of the kidney contributes to the decline in glomerular filtration rate and elevations  
268 in blood pressure observed in patients who take NSAIDs. However, dynamic expression of  
269 COX-2 in the macula densa system is a component of the tubuloglomerular feedback  
270 mechanism which promotes renin release.<sup>35-37</sup> Inhibition of COX-2 in these cells would  
271 counteract the hypertensive effects of renin-angiotensin system activation. Thus, the effect of  
272 NSAID treatment on blood pressure reflects the complex interplay among these regulatory  
273 systems. Interestingly, we observed that an individual participant's response was similar to both  
274 drugs, suggesting that patient-specific factors may contribute to interindividual heterogeneity in

275 the response to NSAIDs. Future studies are necessary to elucidate the factors that contribute to  
276 an individual patient's risk of hypertension and other cardiovascular adverse effects with NSAID  
277 treatment.

278 There are limitations to our study. The small sample size limits our ability to  
279 comprehensively investigate the factors that contribute to the blood pressure response to  
280 NSAIDs. The study cohort included only healthy adults, most of whom were relatively young.  
281 Although this limits potential confounding due to effects of age and comorbidities, it precludes  
282 interrogation of the influence of these factors on the blood pressure response to NSAID  
283 treatment. Finally, we compared only one dose level of naproxen and celecoxib, which limits  
284 our ability to extrapolate our results to higher doses or other NSAIDs. Despite these limitations,  
285 our results provide mechanistic insight into the outcome of PRECISION.

286 In conclusion, our results demonstrate that naproxen 500 mg/day inhibits COX-2 activity  
287 to a greater degree than celecoxib 200 mg/day and that the degree of COX-2 inhibition is  
288 associated with the blood pressure response to NSAID treatment. While PRECISION  
289 concluded non-inferiority of celecoxib compared to naproxen with regard to cardiovascular risk,  
290 this is based on a comparison of doses that are not equipotent.

291

292 **Table 1.** Baseline characteristics of study participants.

| <b>Characteristic</b>    | <b>Study Cohort</b>                  |
|--------------------------|--------------------------------------|
| N (Men/Women)            | 16 (9/7)                             |
| Age                      | 34.7±13.4 years (range: 19-61 years) |
| Race                     |                                      |
| White                    | 9                                    |
| Black/African American   | 4                                    |
| Asian                    | 1                                    |
| Other                    | 2                                    |
| Ethnicity                |                                      |
| Non-Hispanic             | 13                                   |
| Hispanic                 | 3                                    |
| Body mass index          | 22.6±1.9 kg/m <sup>2</sup>           |
| Lab values               |                                      |
| Total cholesterol        | 166.9±27.6 mg/dl                     |
| Triglycerides            | 70.9±24.4 mg/dl                      |
| LDL                      | 94.7±22.9 mg/dl                      |
| HDL                      | 58.1±13.3 mg/dl                      |
| Serum creatinine         | 0.83±0.14 mg/dl                      |
| Systolic blood pressure  | 115.3±8.9 mm Hg                      |
| Diastolic blood pressure | 69.8±9.5 mm Hg                       |
| Heart rate               | 65.7±9.8 bpm                         |

293

294

295 **Figures**

296 **Figure 1.** Comparison of (A) COX-1 inhibition *ex vivo* and (B) *in vivo* and (C) COX-2 inhibition  
297 *ex vivo* and (D) *in vivo* by treatment. Plasma concentrations of (E) celecoxib and (F) naproxen  
298 over time. Dosing occurred at 8:00 AM  $\pm$  15 min. Data are shown as mean  $\pm$  SEM. \* $p < 0.05$

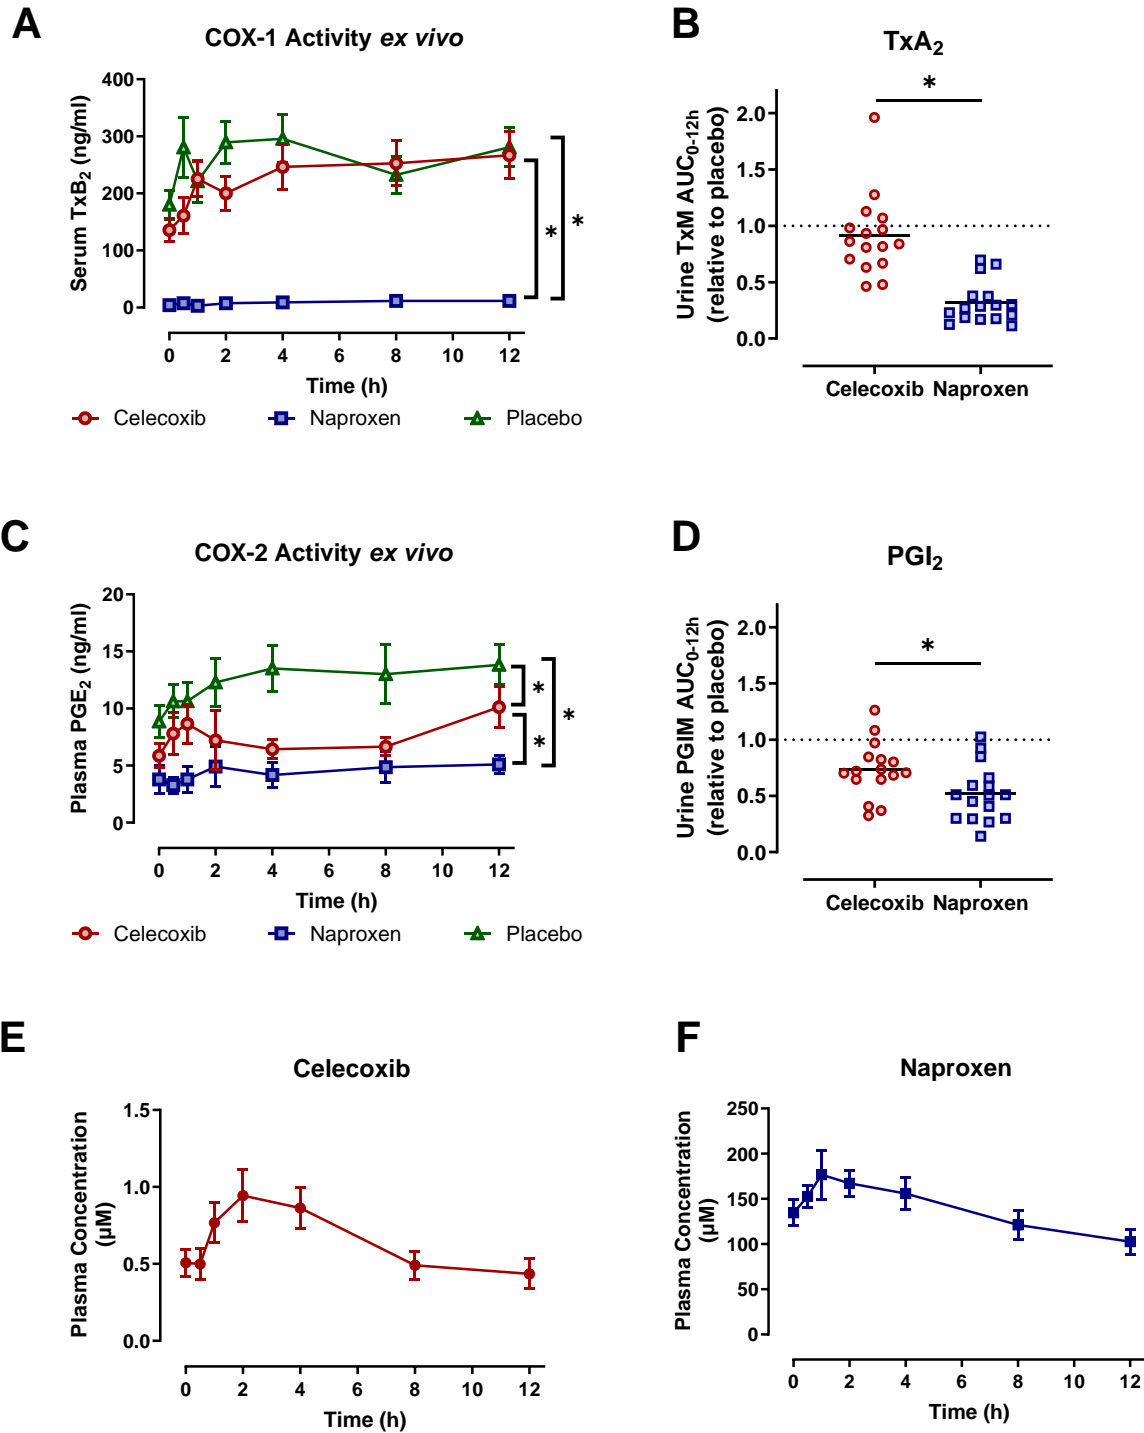

299  
300

301 **Figure 2.** Comparison of (A) SBP, (B) DBP, and (C) MAP over 12-hour dosing interval by  
302 treatment. Data are shown as mean ± SEM. (D) Change in SBP relative to placebo with  
303 celecoxib and naproxen treatment. Dosing occurred at 8:00 AM ± 15 min. \*p<0.05

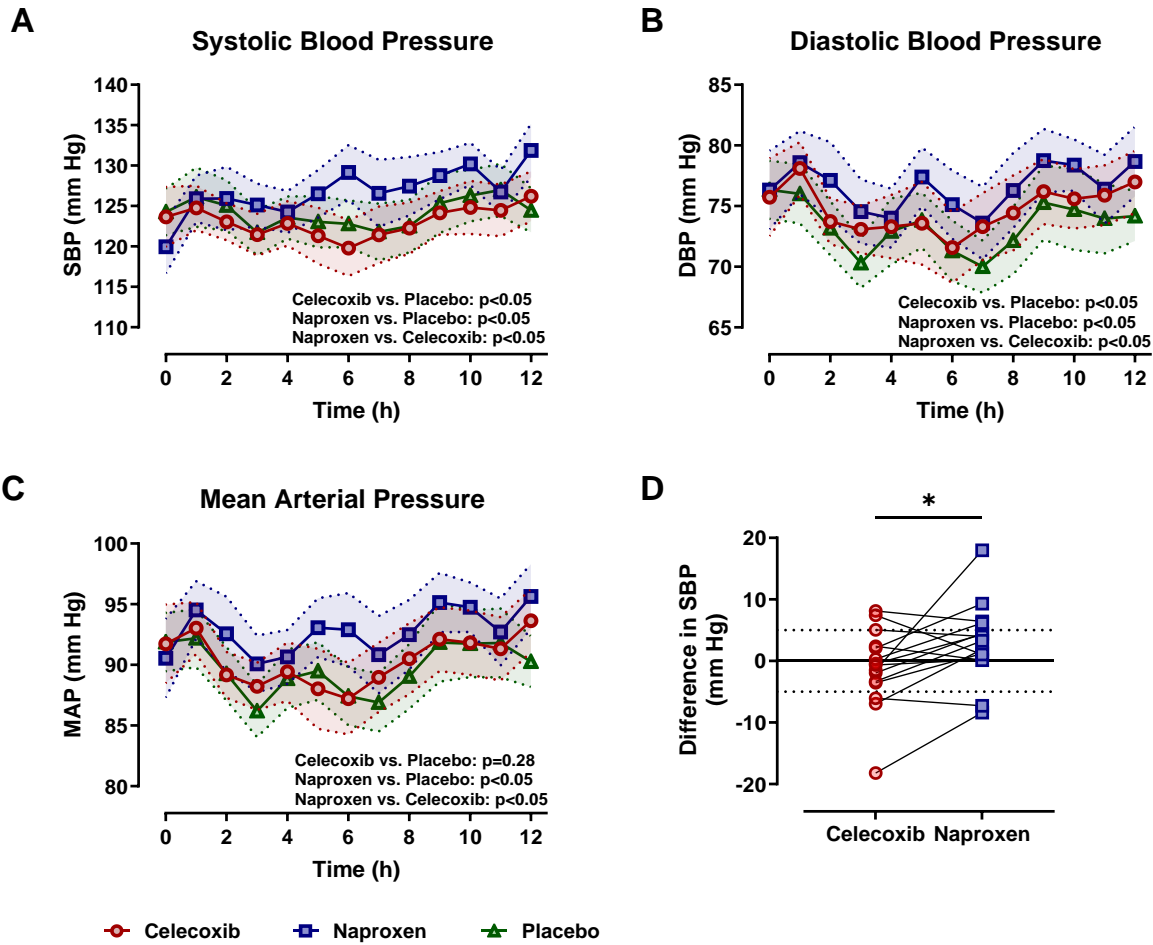

305 **Figure 3.** Relationship between degree of COX-1 and COX-2 inhibition ex vivo and change in  
306 systolic blood pressure.

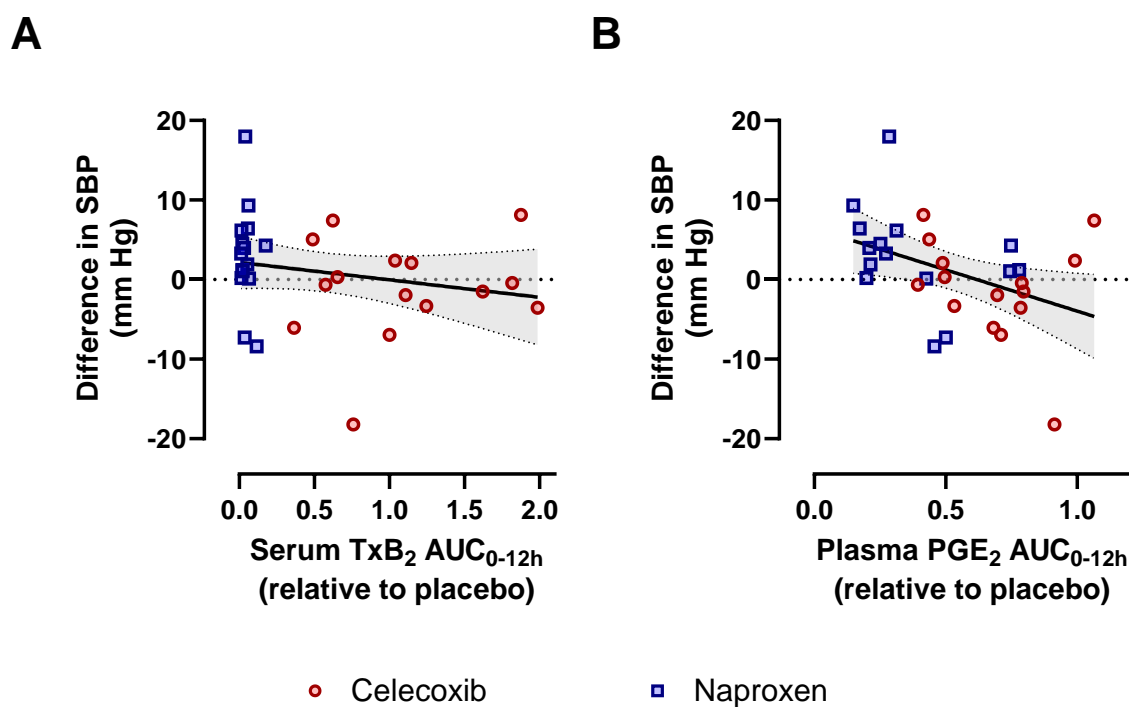

307

308

309 **Sources of Funding**

310 Research reported in this publication was supported by a Translational Medicine and  
311 Therapeutics Postdoctoral Fellowship from the PhRMA Foundation, and funding from the  
312 National Heart, Lung, and the Blood Institute (HL117798) and National Center for Advancing  
313 Translational Sciences of the National Institutes of Health (UL1TR001878). The content is solely  
314 the responsibility of the authors and does not necessarily represent the official views of the  
315 National Institutes of Health.

316 **Acknowledgements**

317 Dr. FitzGerald is the McNeil Professor of Translational Medicine and Therapeutics and held a  
318 Merit Award from the American Heart Association. C.S. is the Robert L. McNeil Jr. Fellow in  
319 Translational Medicine and Therapeutics.

320 **Disclosures**

321 K.N.T., S.G., C.S., S.F., N.F.L., D.S., G.R.G., G.A.F., and T.G. have nothing to disclose.



## 322 References

- 323 1. In: Phillips JK, Ford MA, Bonnie RJ, eds. *Pain Management and the Opioid Epidemic: Balancing*  
324 *Societal and Individual Benefits and Risks of Prescription Opioid Use*. Washington (DC); 2017.
- 325 2. Grosser T, Woolf CJ, FitzGerald GA. Time for nonaddictive relief of pain. *Science*. 2017;355:1026-  
326 1027. doi: 10.1126/science.aan0088
- 327 3. Stagnitti MN. Trends in Outpatient Prescription Analgesics Utilization and Expenditures for the  
328 U.S. Civilian Noninstitutionalized Population, 1996 and 2006. Medical Expenditure Panel Survey.  
329 [https://meps.ahrq.gov/data\\_files/publications/st235/stat235.shtml](https://meps.ahrq.gov/data_files/publications/st235/stat235.shtml). 2009. Accessed 1/5/2024.
- 330 4. Zhou Y, Boudreau DM, Freedman AN. Trends in the use of aspirin and nonsteroidal anti-  
331 inflammatory drugs in the general U.S. population. *Pharmacoepidemiology and drug safety*.  
332 2014;23:43-50. doi: 10.1002/pds.3463
- 333 5. Gorski T, Cadore EL, Pinto SS, da Silva EM, Correa CS, Beltrami FG, Krueel LF. Use of NSAIDs in  
334 triathletes: prevalence, level of awareness and reasons for use. *British journal of sports*  
335 *medicine*. 2011;45:85-90. doi: 10.1136/bjism.2009.062166
- 336 6. Kuster M, Renner B, Oppel P, Niederweis U, Brune K. Consumption of analgesics before a  
337 marathon and the incidence of cardiovascular, gastrointestinal and renal problems: a cohort  
338 study. *BMJ open*. 2013;3. doi: 10.1136/bmjopen-2012-002090
- 339 7. Walker LA, Zambraski EJ, Williams RF. Widespread Use of Prescription Nonsteroidal Anti-  
340 Inflammatory Drugs Among U.S. Army Active Duty Soldiers. *Military medicine*. 2017;182:e1709-  
341 e1712. doi: 10.7205/MILMED-D-16-00183
- 342 8. Institute of Medicine (US) Committee on Advancing Pain Research C, and Education. . *Relieving*  
343 *Pain in America: A Blueprint for Transforming Prevention, Care, Education, and Research*. 2011.  
344 doi: NBK91497 [bookaccession]
- 345 9. Keshwani S, Smith SM, Brown J, Lo-Ciganic WH, Yang S, Smolinski NE, Hincapie-Castillo JM.  
346 Trends in Prescribing of Non-steroidal Anti-inflammatory Medications in the US Ambulatory  
347 Care Setting From 2006 to 2016. *The journal of pain : official journal of the American Pain*  
348 *Society*. 2023. doi: 10.1016/j.jpain.2023.06.008
- 349 10. Grosser T, Yu Y, Fitzgerald GA. Emotion recollected in tranquility: lessons learned from the COX-  
350 2 saga. *Annu Rev Med*. 2010;61:17-33. doi: 10.1146/annurev-med-011209-153129
- 351 11. Krum H, Swergold G, Gammaitoni A, Peloso PM, Smugar SS, Curtis SP, Brater DC, Wang H, Kaur  
352 A, Laine L, et al. Blood pressure and cardiovascular outcomes in patients taking nonsteroidal  
353 antiinflammatory drugs. *Cardiovasc Ther*. 2012;30:342-350. doi: 10.1111/j.1755-  
354 5922.2011.00283.x
- 355 12. Smyth EM, Grosser T, Wang M, Yu Y, FitzGerald GA. Prostanoids in health and disease. *J Lipid*  
356 *Res*. 2009;50 Suppl:S423-428. doi: 10.1194/jlr.R800094-JLR200
- 357 13. Cheng Y, Austin SC, Rocca B, Koller BH, Coffman TM, Grosser T, Lawson JA, FitzGerald GA. Role  
358 of prostacyclin in the cardiovascular response to thromboxane A2. *Science*. 2002;296:539-541.  
359 doi: 10.1126/science.1068711
- 360 14. Yu Y, Ricciotti E, Scalia R, Tang SY, Grant G, Yu Z, Landesberg G, Crichton I, Wu W, Pure E, et al.  
361 Vascular COX-2 modulates blood pressure and thrombosis in mice. *Sci Transl Med*.  
362 2012;4:132ra154. doi: 10.1126/scitranslmed.3003787
- 363 15. Grosser T, Fries S, FitzGerald GA. Biological basis for the cardiovascular consequences of COX-2  
364 inhibition: therapeutic challenges and opportunities. *J Clin Invest*. 2006;116:4-15. doi:  
365 10.1172/JCI27291
- 366 16. Catella-Lawson F, McAdam B, Morrison BW, Kapoor S, Kujubu D, Antes L, Lasseter KC, Quan H,  
367 Gertz BJ, FitzGerald GA. Effects of specific inhibition of cyclooxygenase-2 on sodium balance,  
368 hemodynamics, and vasoactive eicosanoids. *J Pharmacol Exp Ther*. 1999;289:735-741.

- 369 17. Nissen SE, Yeomans ND, Solomon DH, Luscher TF, Libby P, Husni ME, Graham DY, Borer JS,  
370 Wisniewski LM, Wolski KE, et al. Cardiovascular Safety of Celecoxib, Naproxen, or Ibuprofen for  
371 Arthritis. *N Engl J Med*. 2016;375:2519-2529. doi: 10.1056/NEJMoa1611593
- 372 18. Obeid S, Libby P, Husni E, Wang Q, Wisniewski LM, Davey DA, Wolski KE, Xia F, Bao W, Walker C,  
373 et al. Cardiorenal risk of celecoxib compared with naproxen or ibuprofen in arthritis patients:  
374 insights from the PRECISION trial. *Eur Heart J Cardiovasc Pharmacother*. 2022;8:611-621. doi:  
375 10.1093/ehjcvp/pvac015
- 376 19. Ruschitzka F, Borer JS, Krum H, Flammer AJ, Yeomans ND, Libby P, Luscher TF, Solomon DH,  
377 Husni ME, Graham DY, et al. Differential blood pressure effects of ibuprofen, naproxen, and  
378 celecoxib in patients with arthritis: the PRECISION-ABPM (Prospective Randomized Evaluation of  
379 Celecoxib Integrated Safety Versus Ibuprofen or Naproxen Ambulatory Blood Pressure  
380 Measurement) Trial. *European heart journal*. 2017. doi: 10.1093/eurheartj/ehx508
- 381 20. Harris PA, Taylor R, Thielke R, Payne J, Gonzalez N, Conde JG. Research electronic data capture  
382 (REDCap)--a metadata-driven methodology and workflow process for providing translational  
383 research informatics support. *J Biomed Inform*. 2009;42:377-381. doi: 10.1016/j.jbi.2008.08.010
- 384 21. Harris PA, Taylor R, Minor BL, Elliott V, Fernandez M, O'Neal L, McLeod L, Delacqua G, Delacqua  
385 F, Kirby J, et al. The REDCap consortium: Building an international community of software  
386 platform partners. *J Biomed Inform*. 2019;95:103208. doi: 10.1016/j.jbi.2019.103208
- 387 22. Patrignani P, Filabozzi P, Patrono C. Selective cumulative inhibition of platelet thromboxane  
388 production by low-dose aspirin in healthy subjects. *J Clin Invest*. 1982;69:1366-1372.
- 389 23. Panara MR, Renda G, Sciulli MG, Santini G, Di Giamberardino M, Rotondo MT, Tacconelli S, Seta  
390 F, Patrono C, Patrignani P. Dose-dependent inhibition of platelet cyclooxygenase-1 and  
391 monocyte cyclooxygenase-2 by meloxicam in healthy subjects. *J Pharmacol Exp Ther*.  
392 1999;290:276-280.
- 393 24. Li X, Fries S, Li R, Lawson JA, Propert KJ, Diamond SL, Blair IA, FitzGerald GA, Grosser T.  
394 Differential impairment of aspirin-dependent platelet cyclooxygenase acetylation by  
395 nonsteroidal antiinflammatory drugs. *Proc Natl Acad Sci U S A*. 2014;111:16830-16835. doi:  
396 10.1073/pnas.1406997111
- 397 25. Bates D, Mächler M, Bolker B, Walker S. Fitting Linear Mixed-Effects Models Using lme4. *Journal*  
398 *of Statistical Software*. 2015;67:1 - 48. doi: 10.18637/jss.v067.i01
- 399 26. Institute of Medicine (U.S.). Committee on Advancing Pain Research Care and Education.  
400 *Relieving pain in America : a blueprint for transforming prevention, care, education, and*  
401 *research*. Washington, D.C.: National Academies Press; 2011.
- 402 27. Antman EM, Bennett JS, Daugherty A, Furberg C, Roberts H, Taubert KA. Use of nonsteroidal  
403 antiinflammatory drugs: an update for clinicians: a scientific statement from the American Heart  
404 Association. *Circulation*. 2007;115:1634-1642. doi: 10.1161/CIRCULATIONAHA.106.181424
- 405 28. Grosser T, Ricciotti E, FitzGerald GA. The Cardiovascular Pharmacology of Nonsteroidal Anti-  
406 inflammatory Drugs. *Trends Pharmacol Sci*. 2017;38:(in press).
- 407 29. Warner TD, Giuliano F, Vojnovic I, Bukasa A, Mitchell JA, Vane JR. Nonsteroid drug selectivities  
408 for cyclo-oxygenase-1 rather than cyclo-oxygenase-2 are associated with human gastrointestinal  
409 toxicity: a full in vitro analysis. *Proc Natl Acad Sci U S A*. 1999;96:7563-7568.
- 410 30. Snowden S, Nelson R. The effects of nonsteroidal anti-inflammatory drugs on blood pressure in  
411 hypertensive patients. *Cardiol Rev*. 2011;19:184-191. doi: 10.1097/CRD.0b013e31821ddcf4
- 412 31. Terragno NA, Terragno DA, McGiff JC. Contribution of prostaglandins to the renal circulation in  
413 conscious, anesthetized, and laparotomized dogs. *Circulation research*. 1977;40:590-595.
- 414 32. Perazella MA, Tray K. Selective cyclooxygenase-2 inhibitors: a pattern of nephrotoxicity similar  
415 to traditional nonsteroidal anti-inflammatory drugs. *Am J Med*. 2001;111:64-67.

- 416 33. Qi Z, Hao CM, Langenbach RI, Breyer RM, Redha R, Morrow JD, Breyer MD. Opposite effects of  
417 cyclooxygenase-1 and -2 activity on the pressor response to angiotensin II. *J Clin Invest.*  
418 2002;110:61-69.
- 419 34. Zewde T, Mattson DL. Inhibition of cyclooxygenase-2 in the rat renal medulla leads to sodium-  
420 sensitive hypertension. *Hypertension.* 2004;44:424-428.
- 421 35. FitzGerald GA, Hossmann V, Hummerich W, Konrads A. The renin--kallikrein--prostaglandin  
422 system: plasma active and inactive renin and urinary kallikrein during prostacyclin infusion in  
423 man. *Prostaglandins Med.* 1980;5:445-456.
- 424 36. Peti-Peterdi J, Komlosi P, Fuson AL, Guan Y, Schneider A, Qi Z, Redha R, Rosivall L, Breyer MD,  
425 Bell PD. Luminal NaCl delivery regulates basolateral PGE2 release from macula densa cells. *J Clin*  
426 *Invest.* 2003;112:76-82.
- 427 37. Stichtenoth DO, Marhauer V, Tsikas D, Gutzki FM, Frolich JC. Effects of specific COX-2-inhibition  
428 on renin release and renal and systemic prostanoid synthesis in healthy volunteers. *Kidney Int.*  
429 2005;68:2197-2207.

430
